# Supplementary material for: Uptake of gaseous formaldehyde by soil surfaces: a combination of adsorption/desorption equilibrium and chemical reactions
Source: Copernicus journal article supplement (doi:10.5194/acp-2016-273), 2016-04-18
Supplement: Supplementary file 1 [file acp-2016-273-supplement.pdf]

## Supplemental Information

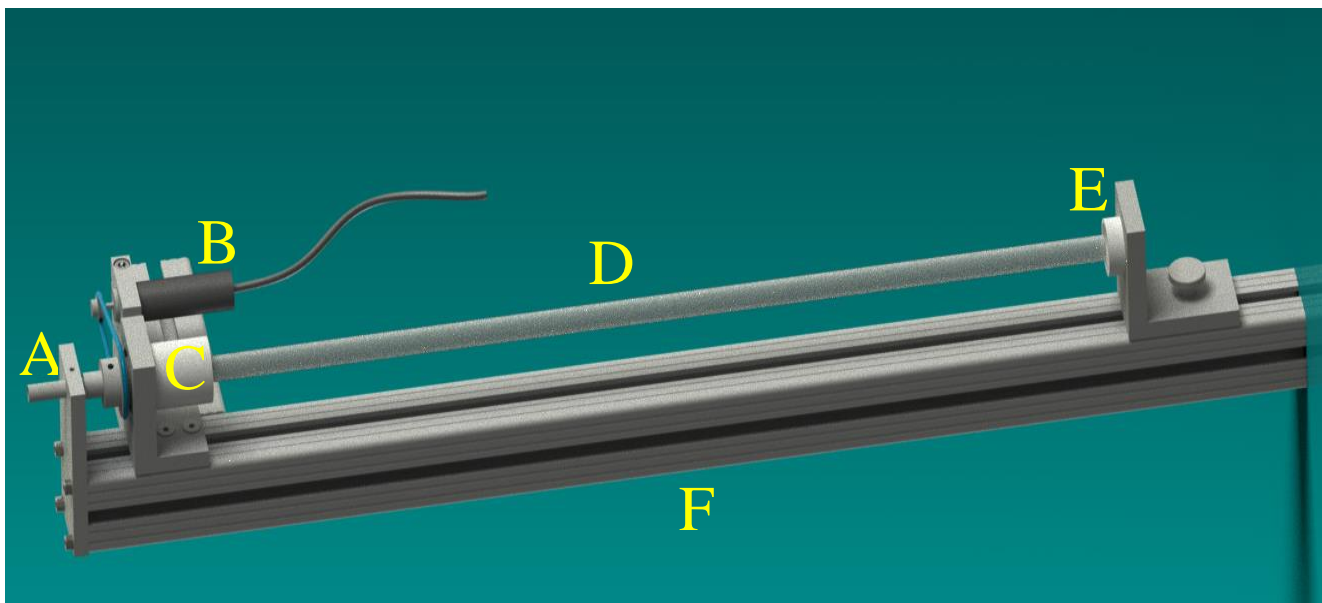

5

**Figure S.1.** Air-dried continuous rotating coating tool (ACRO). (A) flushing gas inlet; (B) motor with a driving belt; (C) fastened tubing holder; (D) coated flow tube; (E) loosened tubing holder; (F) foothold.

10

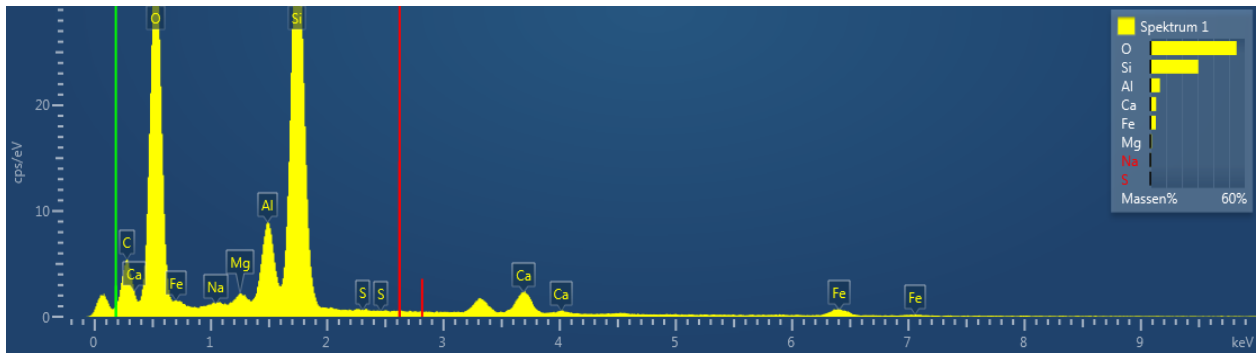

**Figure S.2.** Energy Dispersive X-ray (EDX) analysis of the soil sample.

5

10

15

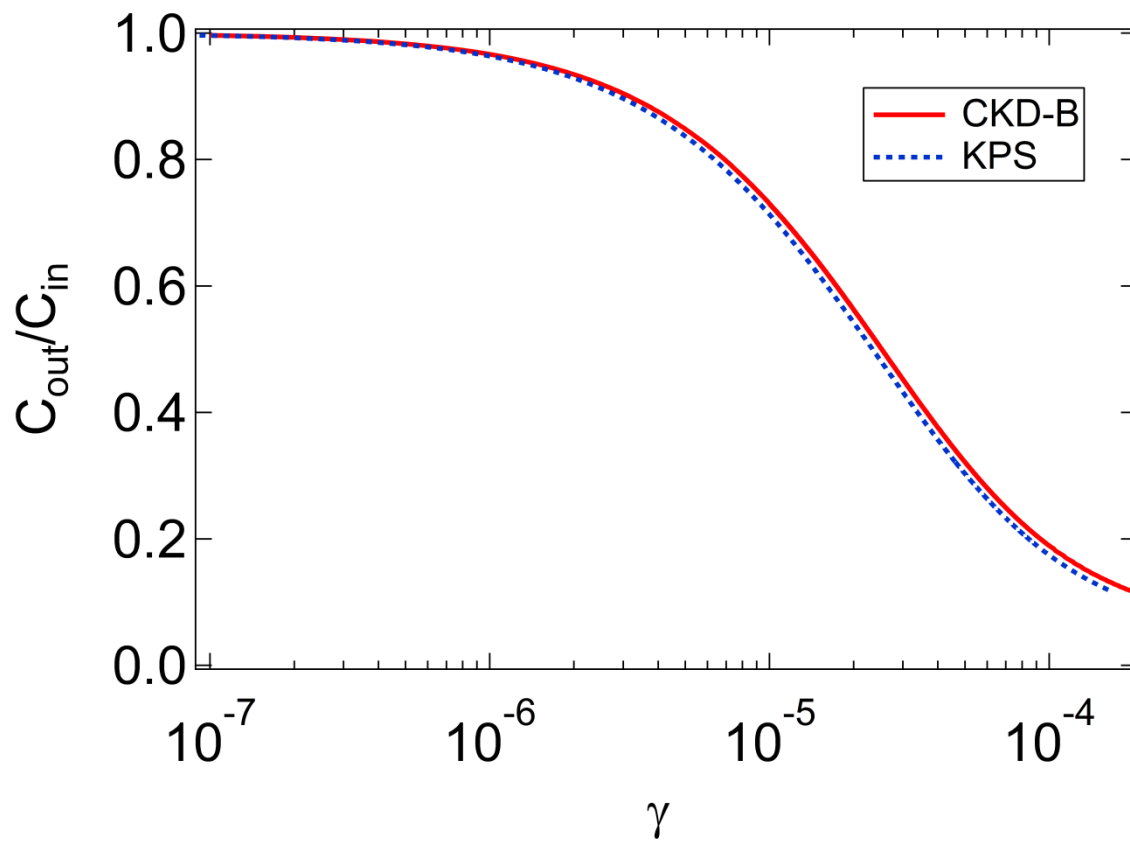

**Figure S.3.** Transmittance  $C_{out}/C_{in}$  versus uptake coefficients derived from both CKD-B and KPS methods, for specified dimensionless length  $z^* = 0.385$  under our experimental conditions.

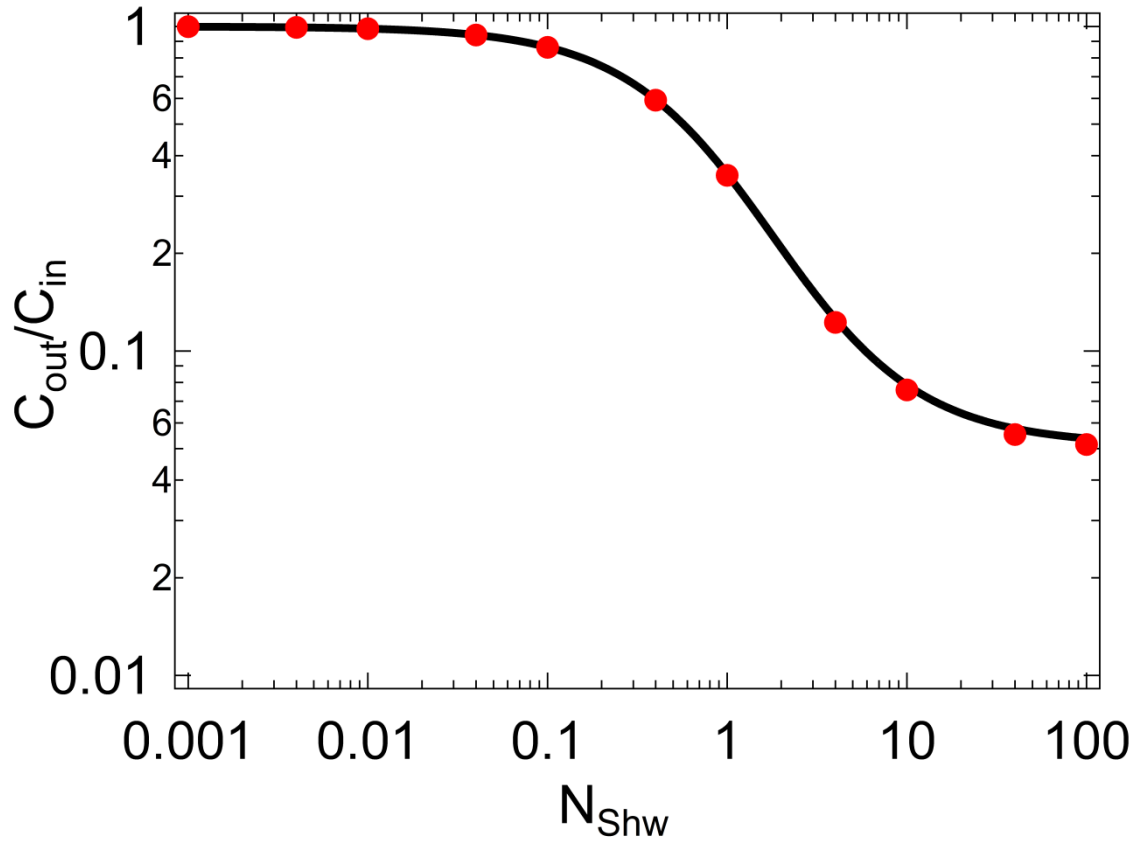

**Figure S.4.** Transmittance  $C_{out}/C_{in}$  versus Sherwood number  $N_{Shw}$ , for specified dimensionless length  $z^* = 0.385$  under our experimental conditions. The red dots represent the values from Table I in the reference of Murphy et al., (1987); the black line denotes values from our calculations.

## Matlab code mannul

### (1) Parameters definition

The parameters adopted in the provided code are defined as follows:

- $L$ : flow tube length;  $R$ : flow tube radius;  $z$ : axial position;  $r$ : radial position;  $F$ : volume flow rate of carrier gas in flow tube;
- 5  $D$ : diffusion coefficient of analyte in the carrier gas under experimental conditions;  $T_0$ : standard temperature, 273K;  $P_0$ : standard pressure, 101kPa;  $T$ : temperature at experimental conditions;  $P$ : pressure at experimental conditions;  $g$ : the uptake coefficient;  $g_{\min}$ : the minimum value of the uptake coefficient;  $g_{\max}$ : the maximum value of the uptake coefficient;  $g_n$ : the number of values of  $g$  from  $g_{\min}$  to  $g_{\max}$ ;  $x$ : the dimensionless form of radius position  $r$ ,  $x = r/R$ , ranging from 0 to 1;
- 10  $t$ : the dimensionless form of axial position  $z$ ,  $t = z \times \pi \times D / (2 \times F) \times (T_0 / T) \times (P / P_0)$ , ranging from 0 to  $t_0$ ;  $t_0$ :  $t_0 = L \times \pi \times D / (2 \times F) \times (T_0 / T) \times (P / P_0)$ ;  $u$ : analyte concentration at the axial and radial position (dimensionless) of  $(t, x)$ ;  $v$ : analyte mean molecular speed;  $N$ : Sherwood number.

For the axial and radial position  $(z, r)$  in a flow tube, see Fig. S.5.

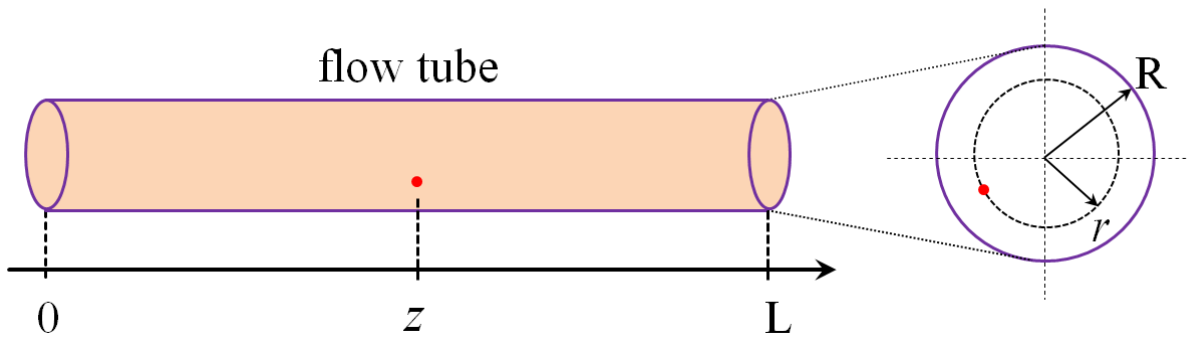

15

**Figure S.5.** Schematic of the axial and radial position  $(z, r)$  in a flow tube with length of  $L$  and radius of  $R$ .

### (2) Parameters input

Open all the \*.m files and input the following parameters:  $L$ ,  $R$ ,  $F$ ,  $D$ ,  $T$ ,  $P$  and  $v$  according to the specific experimental conditions applied. Note that  $g_{\min}$ ,  $g_{\max}$  and  $g_n$  should be specified in advance and also for the numbers ( $n$ ) of  $t$  and  $x$

20 within their effective ranges. In principle, the larger the  $n$  input, the more precise the results are.

### (3) Results output

After input/change of the parameters, please SAVE the parameters setting. Then RUN the Main.m file. A red process bar will show as the code is running. Please wait until the calculation ends. The output results include two tables and two plots:

```
table_g = [g', end_mean_u'] = table [y, Cout/Cin]
```

```
table_N = [N', end_mean_u'] = table [NShw, Cout/Cin]
```

```
plot(g, end_mean_u) = plot( $\gamma$ , Cout/Cin)
```

5

```
plot(N, end_mean_u) = plot(NShw, Cout/Cin)
```

The tables and plots will be saved automatically into the folder in which the \*.m files are located.

### Matlab code

#### 10 Main.m

```
function Main()  
L = 0.25;  
% the length of the flow tube, 0.25 m  
F = 1*10(-3)/60;  
15 % the sample volume flow rate, 1.6667e-005 m3/s  
D = 0.0000177;  
% HCHO diffusion coefficient in N2 at 296k and 101kPa, 0.0000177 m2/s  
T0 = 273;  
% temperature at standard conditions, 273 K  
20 P0 = 101;  
% pressure at standard conditions, 101 kPa  
T = 296;  
% temperature at experimental conditions, 296 K  
P = 101;  
25 % pressure at experimental conditions, 101 kPa  
t0=L*pi*D/(2*F)*(T0/T)*(P/P0);  
g_min= 1e-7;  
g_max = 1e-4;  
g_n = 100;  
30 % g is uptake coefficient, g_n is the number of g between g_min and g_max  
pdex1(t0,g_min,g_max,g_n)
```

#### pdex1.m

```
function pdex1(t0,g_min,g_max,g_n)  
m = 1;  
35 x = linspace(0,1,100);  
% x = r* = r/R, x ranging from 0 to 1, r is radial position, R is the  
% radius of the flow tube  
t = linspace(0,t0,100);  
% t = z* = z*pi*D/(2*F)*(T0/T)*(P/P0), z is axial position, z ranging from  
40 % 0 to L, t ranging from 0 to t0, t0 corresponding to the whole length of
```

```

% the flow tube (dimensionless)
g = linspace(g_min,g_max,g_n);
% g is uptake coefficient,g_n is number of g between g_min and g_max
global g_i
5 h = waitbar(0,'Please wait...');
  steps = length(g);
  for i=1:length(g)
    g_i = g(i);
    sol = pdepe(m,@pdex1pde,@pdex1ic,@pdex1bc,x,t);
10
    u = sol(:, :, 1);
    N_f(g(i))
    end_mean_u(i) = mean(u(end, :));
    waitbar(i / steps)
15 end
  close(h)
  table_g = [g',end_mean_u'];
  xlswrite(['results,g',num2str(t0),'-',num2str(g_min),'.xls'], table_g)
  figure
20 plot(g,end_mean_u)
  xlabel('Uptake coefficient')
  ylabel('Cout/Cin')
  title('Cout/Cin vs Uptake coefficient')
  saveas(gcf,['results,g',num2str(t0),'-',num2str(g_min),'.fig'],'fig')
25 close(gcf)
  N = N_f(g);
  table_N = [N',end_mean_u'];
  xlswrite(['results,N',num2str(t0),'-',num2str(g_min),'.xls'], table_N)
  figure
30 plot(N,end_mean_u)
  xlabel('Sherwood Number')
  ylabel('Cout/Cin')
  title('Cout/Cin vs Sherwood Number')
  saveas(gcf,['results,N',num2str(t0),'-',num2str(g_min),'.fig'],'fig')
35 close(gcf)

```

### pdex1pde.m

```

function [c,f,s] = pdex1pde(x,t,u,DuDx)
c = 1-x^2;
f = DuDx;
40 s = 0;

```

### pdex1ic.m

```

function u0 = pdex1ic(x)
u0 = 1;

```

### **pdex1bc.m**

```
function [pl,ql,pr,qr] = pdex1bc(xl,ul,xr,u,t)
global g_i;
pl = 0;
5 ql = 0;
pr = N_f(g_i)*u;
qr = 1;
```

### **N\_f.m**

```
function N = N_f(g)
10 v = 457.16;
% mean molecular velocity of HCHO, 457.16 m/s
R = 0.0035;
% flow tube radius, 0.0035 m
D = 0.0000177;
15 % HCHO diffusion coefficient in N2 at 296k and 101kPa, 0.0000177 m^2/s
N = 0.5*(v*R/D).*g./(2-g);
% Sherwood number
```
